# Supplementary material for: A core set of venom proteins is released by entomopathogenic nematodes in the genus Steinernema
Source: PubMed Central journal article supplement (PMC6513111; doi:10.1371/journal.ppat.1007626), 2019-05-01

**A)** *S. feltiae* ESP time course concentration

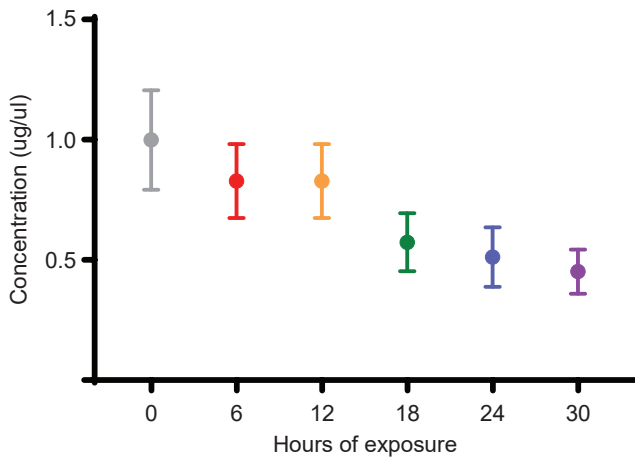

Supplement: ppat.1007626.s001.pdf [file ppat.1007626.s001.pdf]
