# Supplementary material for: A core set of venom proteins is released by entomopathogenic nematodes in the genus Steinernema
Source: PubMed Central journal article supplement (PMC6513111; doi:10.1371/journal.ppat.1007626), 2019-05-01

A)

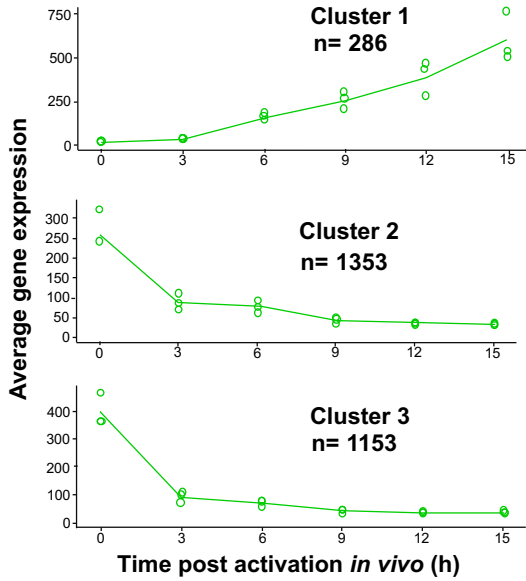

B)

**Representative GO terms**

**Cluster 1**

- Catalytic activity (3.65e-10)
- Hydrolase activity (4.01e-9)
- Peptidase activity (6.49e-9)
- Defense response to bacterium (1.44e-5)

**Cluster 2**

- Neuropeptide signaling pathway (4.18e-10)
- Kinase activity (7.89e-5)
- Phosphoprotein phosphatase activity (5.8e-4)
- Cellular response to stimulus (2.08e-5)

**Cluster 3**

- Regulation of serine kinase activity (2.21e-4)
- Phosphatase activity (6.93e-5)
- Negative regulation of catalytic activity (4.71e-4)
- Regulation of protein phosphorylation (2.18e-5)

C)

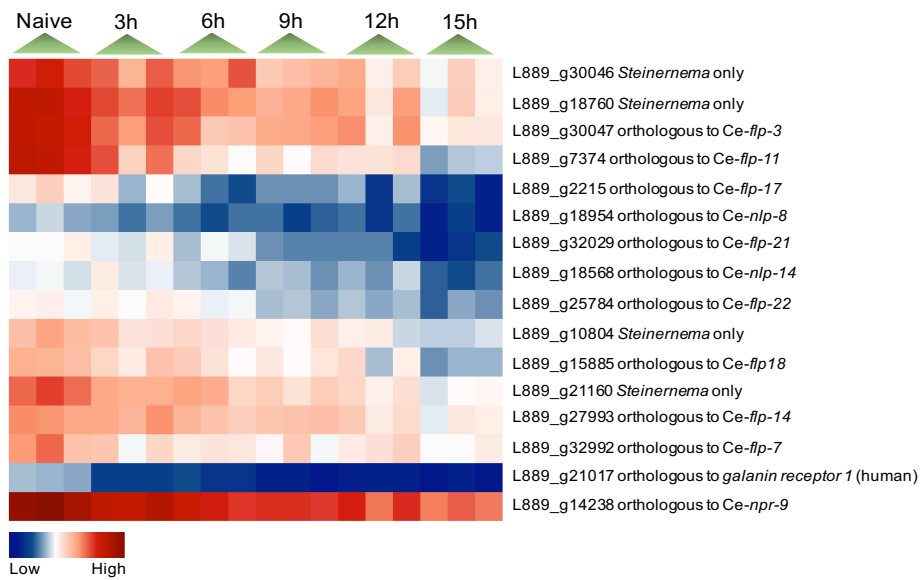

Supplement: ppat.1007626.s004.pdf [file ppat.1007626.s004.pdf]
