# Supplementary material for: A core set of venom proteins is released by entomopathogenic nematodes in the genus Steinernema
Source: PubMed Central journal article supplement (PMC6513111; doi:10.1371/journal.ppat.1007626), 2019-05-01
Supplement: ppat.1007626.s005.pdf [file ppat.1007626.s005.pdf]

A)

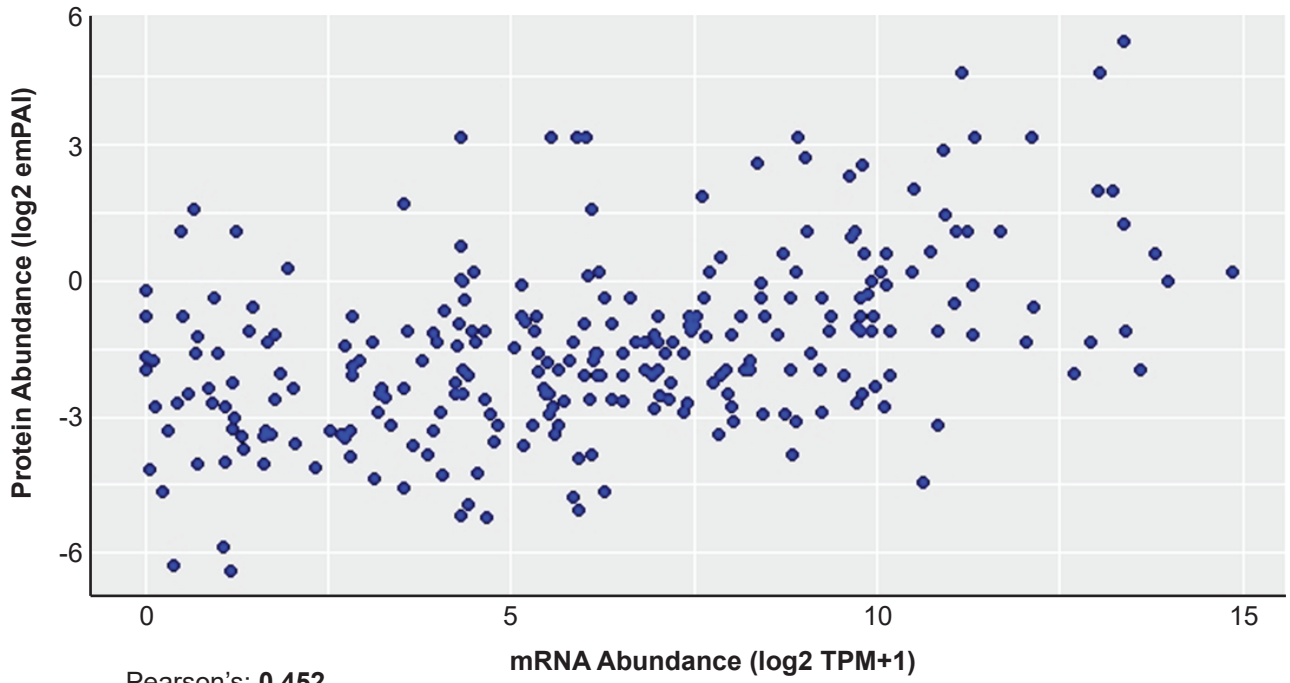

Pearson's: **0.452**  
Spearman's: **0.438**
