# Supplementary material for: A core set of venom proteins is released by entomopathogenic nematodes in the genus Steinernema
Source: PubMed Central journal article supplement (PMC6513111; doi:10.1371/journal.ppat.1007626), 2019-05-01

A) Number of orthologs of core ESPs in non-*Steinernema* nematodes

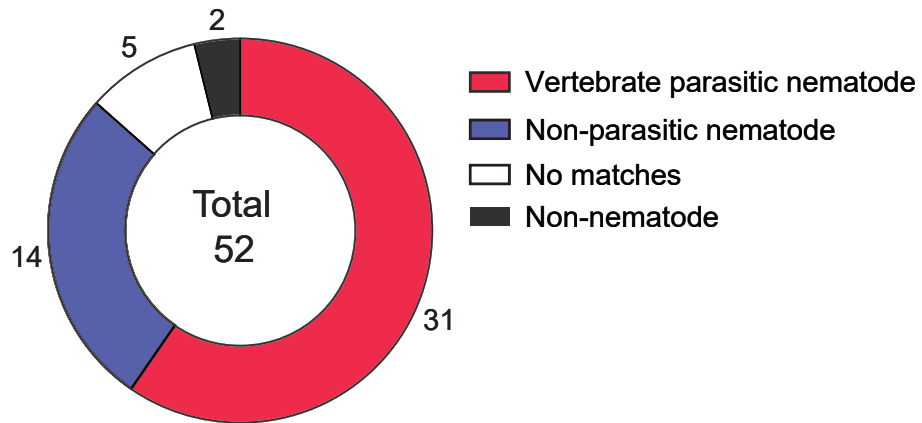

Supplement: ppat.1007626.s006.pdf [file ppat.1007626.s006.pdf]
