# Supplementary material for: A core set of venom proteins is released by entomopathogenic nematodes in the genus Steinernema
Source: PLoS Pathog. 2019 May 1;15(5):e1007626. doi: 10.1371/journal.ppat.1007626 (PMC6513111; doi:10.1371/journal.ppat.1007626)
Supplement: S5 Table — List of 112 S. feltiae (L889) venom gene IDs with homologs in S. carpocapsae (L596) venom [5]. (XLSX) [file ppat.1007626.s011.xlsx]

## Sheet: Supplemental.TABLE5.112.ortholo
S. feltiae	S. carpocapsae	Description	Length	#Hits	e-Value	sim mean
L889_g22648	L596_g11858	40S ribosomal S3	249	20	5.06e-144	89.95
L889_g1069	L596_g1688	60S acidic ribosomal P0	448	20	2.75e-176	84.85
L889_g18713	L596_g11876	Adenine Nucleotide Translocator	332	20	0	93.65
L889_g19080	L596_g18352	alpha beta domain	822	20	0	69.45
L889_g17315	L596_g9647	Aminopeptidase in chromosome V	519	20	0	73.85
L889_g1608	L596_g15954	Ancylostoma secreted	254	20	2.08e-43	53.85
L889_g1607	L596_g15954	Ancylostoma secreted	257	20	1.88e-43	54.05
L889_g13319	L596_g15954	Ancylostoma secreted	157	20	1.85e-15	57.15
L889_g30951	L596_g18671	astacin	981	20	1.48e-62	52.5
L889_g27673	L596_g18671	astacin	535	20	1.19e-48	45.4
L889_g27001	L596_g18671	astacin	1383	20	4.75e-60	50.85
L889_g24639	L596_g18345	beta-glucosidase	281	20	2.42e-73	67.65
L889_g24637	L596_g18345	Beta-glucosidase 6	172	20	1.91e-41	60.4
L889_g23492	L596_g13236	briggsae CBR-LYS-8	277	20	1.34e-75	60.1
L889_g32351	L596_g26325	C-type lectin	1046	20	7.51e-47	56.1
L889_g24908	L596_g17081	carboxypeptidase A2	712	20	1.05e-162	51
L889_g9871	L596_g8779	CHT-1	360	20	4.8e-53	66
L889_g27668	L596_g13883	chymotrypsin-like serine protease precursor	321	20	1.45e-58	46.7
L889_g2504	L596_g13883	chymotrypsin-like serine protease precursor	174	20	2.01e-46	52.05
L889_g16440	L596_g4009	chymotrypsin-like serine protease precursor	262	20	4.53e-30	46.7
L889_g7952	L596_g4541	class 3 family-containing	365	20	3.66e-132	63.5
L889_g20288	L596_g13282	Cullin-1	807	20	0	61
L889_g28318	L596_g11503	D domain (prokaryotic heat shock )	386	20	4.31e-58	59.75
L889_g30019	L596_g12457	Disorganized muscle 1	323	20	0	88.15
L889_g15231	L596_g21048	disulfide-isomerase domain	491	20	0	86.65
L889_g13771	L596_g25423	E3 ubiquitin- ligase Topors	629	20	2.02e-15	42.65
L889_g11860	L596_g23280	EGF-like domain	514	20	1.1e-150	62.05
L889_g14274	L596_g10051	enolase	486	20	0	92.85
L889_g30207	L596_g5757	Epidermal growth factor-like domain and C-type lectin domain and von Willebrand type A domain and MD domain and C-type lectin-like domain and C-type lectin fold domain-containing	1816	20	0	56.9
L889_g8149	L596_g26912	eukaryotic aspartyl protease	419	20	0	67.9
L889_g21180	L596_g6808	Extracellular superoxide dismutase [Cu-Zn]	181	20	2.41e-60	70.85
L889_g11351	L596_g26099	fatty-acid and retinol-binding 1	186	20	1.69e-07	47.85
L889_g19039	L596_g19775	Ferritin	175	20	5.81e-97	83.95
L889_g4161	L596_g4027	FKBP-type peptidyl-prolyl cis-trans isomerase-12	108	20	5.99e-57	85.3
L889_g10456	L596_g16131	galactose-specific lectin nattectin-like	630	20	1.51e-20	48.35
L889_g21047	L596_g5608	galectin	277	20	0	91
L889_g21068	L596_g21441	Gelsolin 1	601	20	0	73.95
L889_g29929	L596_g12371	globin	157	20	9.93e-78	75.65
L889_g9087	L596_g28078	glutathione S-transferase	206	20	2.66e-67	63.5
L889_g30738	L596_g12208	glycogen phosphorylase	928	20	0	91.9
L889_g4696	L596_g10901	Glycoside hydrolase domain containing	709	20	0	62.1
L889_g19911	L596_g14641	Glycoside hydrolase domain containing	598	20	0	57.8
L889_g12686	L596_g8779	glycosyl family 18	573	20	2.72e-161	63.6
L889_g5711	L596_g3758	Golgi apparatus 1 homolog	1169	20	0	71.6
L889_g31225	L596_g13602	Gut esterase 1	558	20	3.35e-132	54.5
L889_g24964	L596_g1362	Hypothetical protein SRAE_1000099100	176	5	7.03e-10	52
L889_g1519	L596_g1362	Hypothetical protein SRAE_1000099100	190	5	6.17e-07	49.8
L889_g6979	L596_g1362	Hypothetical protein SRAE_1000115300	1225	6	5.86e-34	45.83
L889_g5433	L596_g617	Hypothetical protein SRAE_1000115300	732	6	4.81e-18	44.33
L889_g3850	L596_g1362	Hypothetical protein SRAE_1000115300	515	6	4.11e-36	47.83
L889_g33393	L596_g1362	Hypothetical protein SRAE_1000115300	502	6	1.22e-46	45.83
L889_g26236	L596_g1362	Hypothetical protein SRAE_1000115300	285	6	5.23e-32	45.5
L889_g20854	L596_g1362	Hypothetical protein SRAE_1000115300	424	6	3.19e-30	44
L889_g10510	L596_g1362	Hypothetical protein SRAE_1000115300	585	6	3.24e-45	45.67
L889_g10398	L596_g1362	Hypothetical protein SRAE_1000115300	277	6	7.66e-22	45.17
L889_g2955	L596_g617	Hypothetical protein SRAE_2000520300	721	2	8.09e-06	45
L889_g29694	L596_g16717	hypothetical protein Tcan_11773	353	16	7.46e-73	56.69
L889_g3860	L596_g18671	hypothetical protein Y032_0041g386	203	20	4.45e-14	50.1
L889_g7222	L596_g24919	importin-5 isoform X1	1100	20	0	69.8
L889_g25665	L596_g21700	isoform h	3653	20	0	72.2
L889_g5821	L596_g22858	lectin C-type domain	494	20	5.66e-21	43.3
L889_g22941	L596_g22858	lectin C-type domain	261	20	7.71e-24	44.6
L889_g22306	L596_g20127	lipocalin cytosolic fatty-acid binding	134	20	7.47e-46	69.95
L889_g12234	L596_g2588	Lysosomal alpha-mannosidase	991	20	0	63.65
L889_g21070	L596_g8698	Malate synthase	781	20	0	72.9
L889_g12587	L596_g8698	Malate synthase	969	20	0	84.35
L889_g32700	L596_g15842	metalloproteinase inhibitor 2-like isoform X1	140	20	3.75e-10	48.55
L889_g31364	L596_g17004	myosin head	1175	20	0	85.75
L889_g12299	L596_g18345	myrosinase 1-like	207	20	7.25e-49	61.3
L889_g12298	L596_g18345	myrosinase 1-like	206	20	5.12e-64	71.4
L889_g14284	L596_g7445	Nematode poly allergen ABA-1	2638	20	0	54.1
L889_g17950	L596_g17409	OV-16 antigen	207	20	6.54e-98	81.75
L889_g25774	L596_g3155	peptidase family M13	857	20	6.24e-95	49.3
L889_g5627	L596_g18671	Peptidase M12A and Metridin toxin domain containing	195	20	4.98e-27	50.25
L889_g28010	L596_g18671	Peptidase M12A and Metridin toxin domain containing	1403	20	1.62e-51	47.75
L889_g2795	L596_g18671	Peptidase M12A and Metridin toxin domain containing	522	20	3.46e-59	50.65
L889_g20380	L596_g18671	Peptidase M12A and Metridin toxin domain containing	1118	20	6.77e-36	50.5
L889_g1309	L596_g18671	Peptidase M12A and Metridin toxin domain containing	731	20	2.57e-56	49.7
L889_g24428	L596_g12709	peptidyl-prolyl cis-trans cyclophilin-type	221	20	5.02e-121	84.65
L889_g12847	L596_g3692	peroxiredoxin-1	199	20	2.99e-122	89.7
L889_g23762	L596_g15682	Phosphate carrier mitochondrial	387	20	0	85.5
L889_g26532	L596_g2225	Phosphoenolypyruvate inase	302	20	9.5e-168	81.15
L889_g15887	L596_g1988	Poly(U)-specific endoribonuclease	236	20	4.01e-52	56.05
L889_g21366	L596_g5379	PQN-31 isoform a	118	2	0.000672	50.5
L889_g1870	L596_g7254	Probable 3-hydroxyacyl- dehydrogenase	308	20	2.05e-158	78.65
L889_g22796	L596_g22929	Purple acid phosphatase	422	20	6.29e-30	55.1
L889_g20434	L596_g26206	reticulon-1-A isoform X5	220	20	3.09e-72	63.2
L889_g6015	L596_g22823	Saposin B domain and Saposin-like domain-containing	125	1	1.17e-07	49
L889_g12302	L596_g25318	serine carboxypeptidase	648	20	4.61e-171	57.6
L889_g26942	L596_g24286	serine carboxypeptidase S28	486	20	2.21e-90	62.2
L889_g30338	L596_g13883	serine protease	505	20	4.73e-57	43.4
L889_g30335	L596_g13883	serine protease	325	20	8.03e-66	49.3
L889_g12999	L596_g6391	Serine threonine- phosphatase PP1-beta	330	20	0	96.15
L889_g32006	L596_g19926	Serine threonine- phosphatase PP1-beta catalytic subunit	328	20	0	95.75
L889_g24091	L596_g13662	Small nuclear ribonucleoprotein Sm D3	146	20	2.33e-64	85.6
L889_g33439	L596_g1460	Sulfatase domain containing	576	20	0	70.35
L889_g10241	L596_g24248	Transaldolase	322	20	5.04e-177	82.2
L889_g11528	L596_g21539	transcription elongation factor SPT6-like isoform X2	357	3	5.54e-07	51.33
L889_g24277	L596_g26670	transmembrane protease serine 9-like	622	20	5.87e-49	46.65
L889_g18653	L596_g11309	triacylglycerol lipase	316	20	8.38e-18	47.55
L889_g2501	L596_g13883	TRYpsin-like protease	206	20	7e-48	54.4
L889_g1265	L596_g10897	Twitchin	3521	20	0	79.45
L889_g32870	L596_g6709	UPF0160 mitochondrial	87	20	4.82e-12	81.7
L889_g31731	L596_g3998	Zinc metalloproteinase nas-34	1354	20	2.68e-52	47.4
L889_g13905	L596_g16057	---NA---	100
L889_g31037	L596_g16057	---NA---	100
L889_g31036	L596_g16057	---NA---	100
L889_g20573	L596_g21990	---NA---	164
L889_g12823	L596_g5530	---NA---	524
L889_g20114	L596_g26019	---NA---	368
L889_g19802	L596_g26019	---NA---	197
L889_g15105	L596_g23753	---NA---	420
